# Supplementary material for: Ion-selective copper hexacyanoferrate with an open-framework structure enables high-voltage aqueous mixed-ion batteries
Source: Royal Society of Chemistry journal article supplement (doi:10.1039/c7ta04172a), 2017-01-01
Supplement: c7ta04172a1.pdf [file c7ta04172a1.pdf]

## Supporting Information

### **Ion-selective Copper Hexacyanoferrate with Open-framework Structure Enables High-voltage Aqueous Mixed-ion Batteries**

Ping Jiang<sup>a,b,c</sup>, Hezhu Shao<sup>a,c</sup>, Liang Chen<sup>a,c\*</sup>, Jiwen Feng<sup>b,c</sup>, Zhaoping Liu<sup>a,c\*</sup>

<sup>a</sup> Key Laboratory for Graphene Technology and Application of Zhejiang Province, Ningbo Institute of materials Technology and Engineering, Chinese Academy of Sciences, Ningbo 315201, P.R. China

<sup>b</sup> Wuhan Institute of Physics and Mathematics, Chinese Academy of Sciences, Wuhan 430071, P.R. China

<sup>c</sup> University of Chinese Academy of Sciences, Beijing 100000, P.R. China

\* Corresponding author. E-mail: cl@nimte.ac.cn, liuzp@nimte.ac.cn.

**Figure S1.**

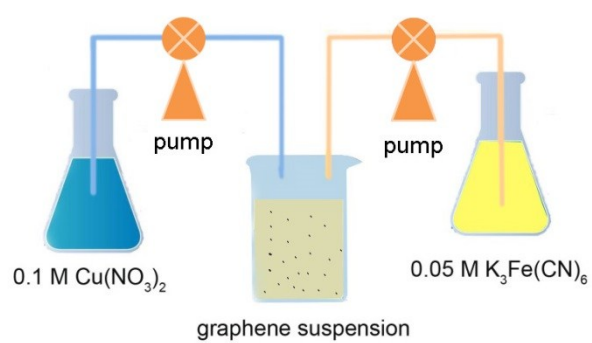

**Figure S1.** A scheme of the co-precipitation process for CuHCF/Gr.

**Figure S2**

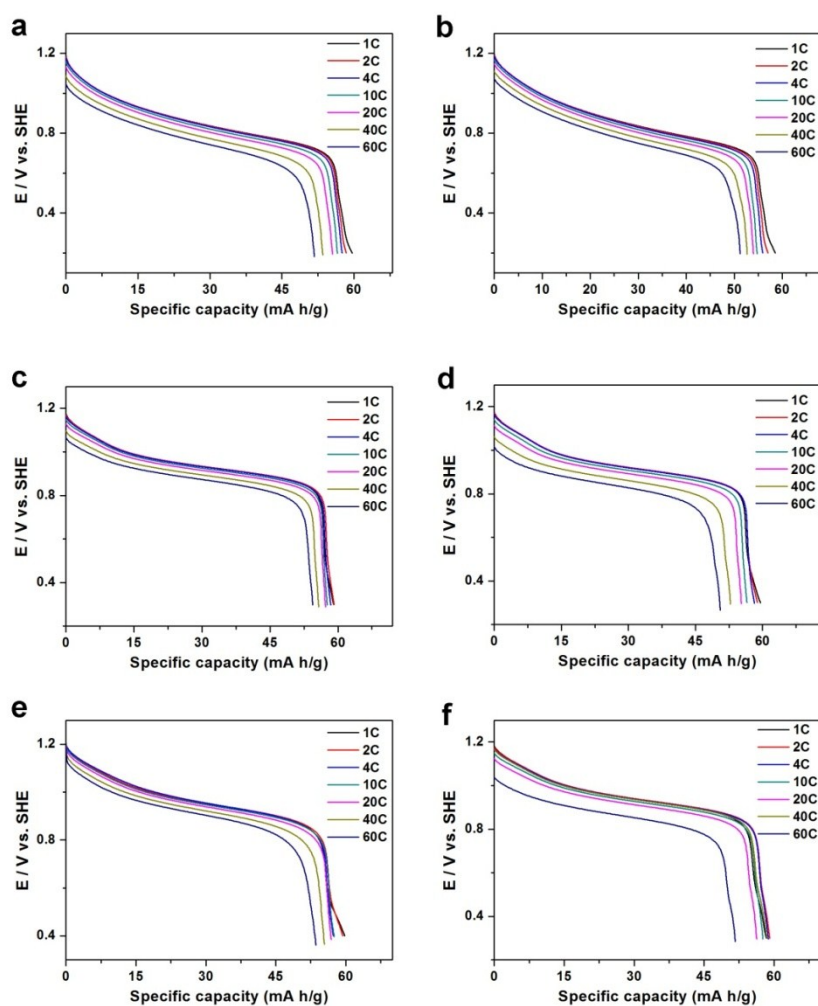

**Figure S2.** Rate capabilities of CuHCF in aqueous 0.1 M  $\text{Li}_2\text{SO}_4$  + 0.4 M  $\text{Na}_2\text{SO}_4$  (a), 0.25 M  $\text{Li}_2\text{SO}_4$  + 0.25 M  $\text{Na}_2\text{SO}_4$  (b), 0.1 M  $\text{Li}_2\text{SO}_4$  + 0.4 M  $\text{K}_2\text{SO}_4$  (c), 0.25 M  $\text{Li}_2\text{SO}_4$  + 0.25 M  $\text{Na}_2\text{SO}_4$  (d), 0.1 M  $\text{Na}_2\text{SO}_4$  + 0.4 M  $\text{K}_2\text{SO}_4$  (e), and 0.25 M  $\text{Na}_2\text{SO}_4$  + 0.25 M  $\text{K}_2\text{SO}_4$  (f). 1C equals to 60 mA g<sup>-1</sup>.

**Figure S3**

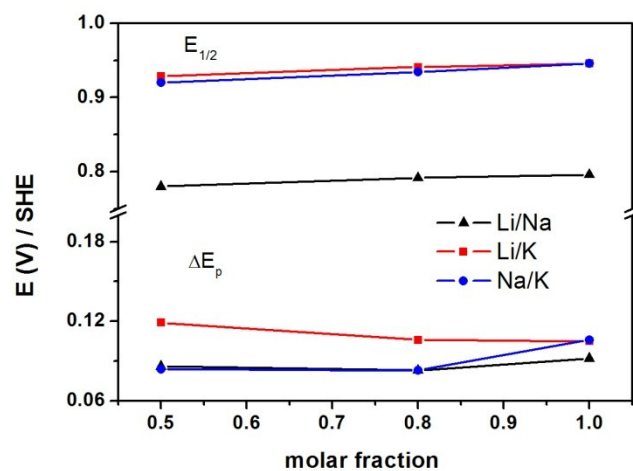

**Figure S3.** Plots of  $E_{1/2}$  and  $\Delta E_p$  vs. the mole fraction of  $\text{Li}^+/\text{Na}^+$ ,  $\text{Li}^+/\text{K}^+$ , and  $\text{Na}^+/\text{K}^+$  mixed-ion electrolytes.  $E_{1/2}$ , formal potential, the average of the anode and cathode peak potentials;  $\Delta E_p$ , the difference voltage between anode and cathode peak potentials.

**Figure S4**

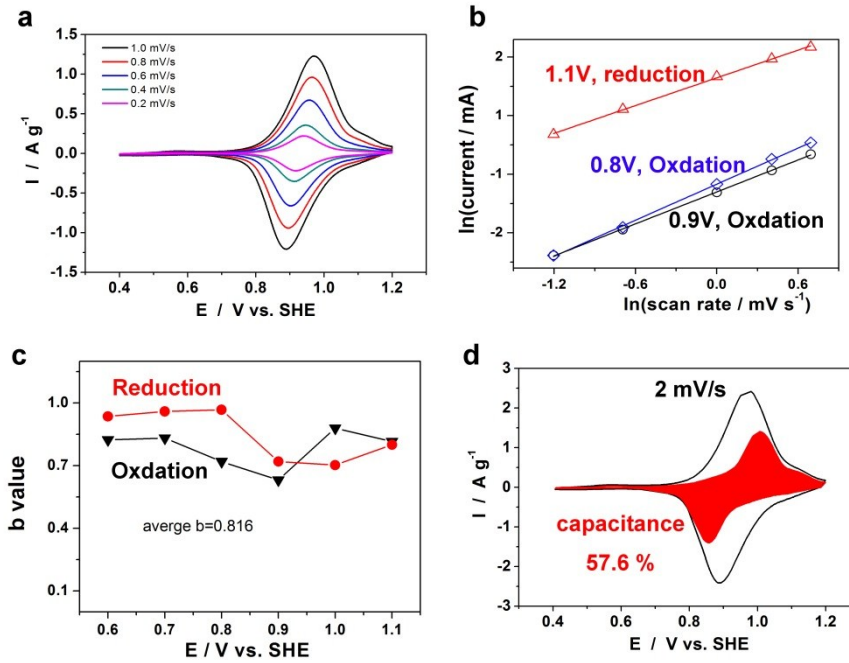

**Figure S4.** (a) Cyclic voltammograms of CuHCF/Gr in 0.4 M K<sub>2</sub>SO<sub>4</sub> + 0.1 M Na<sub>2</sub>SO<sub>4</sub> at various scan rates. (b) The fitted lines of  $\ln(\text{peak current})$  versus  $\ln(\text{scan rate})$  at different reduction/oxidation potentials. (c)  $b$ -value obtained at different reduction/oxidation potentials. (d) Cyclic voltammogram of CuHCF/Gr in 0.4 M K<sub>2</sub>SO<sub>4</sub> + 0.1 M Na<sub>2</sub>SO<sub>4</sub> at a scan rate of 2 mV s<sup>-1</sup> with the capacitive contribution (the red region).

The currents ( $i$ ) at various scan rates ( $v$ ) should obey the power law (equation 1 and 2), where  $a$  and  $b$  are adjustable parameters.

$$i = av^b \quad (1)$$

$$\ln i = b \ln v + \ln a \quad (2)$$

For a redox reaction limited by semi-infinite diffusion, the peak current  $i$  varies as  $v^{1/2}$  ( $b = 1$ ); for a capacitive process, it varies as  $v$  ( $b = 0.5$ ). The CV curves of CuHCF/Gr in 0.4 M K<sub>2</sub>SO<sub>4</sub> + 0.1 M Na<sub>2</sub>SO<sub>4</sub> electrolytes at various scan rates are recorded in Figure S4a. From the  $\ln i$  vs.  $\ln v$  curves in Figure S4b, the average  $b$  value is found to be 0.82, demonstrates that a combination of capacitive process and diffusion-limited redox reactions manages the electrochemical reaction. Thus, the  $i$  value consists of two parts, and can be expressed as following equation:

$$i = k_1 v + k_2 v^{1/2} \quad (3)$$

As  $k_1$  and  $k_2$  are always fixed for the same electrochemical reaction, we can calculate  $k_1$  and  $k_2$  through the equation 3. The capacitance contribution of CuHCF/Gr in 0.4 M K<sub>2</sub>SO<sub>4</sub> + 0.1 M Na<sub>2</sub>SO<sub>4</sub> is found to be 57.6%, which accounts for the high rate capability of CuHCF/Gr. Similar phenomenon are found in other electrolytes.

**Figure S5**

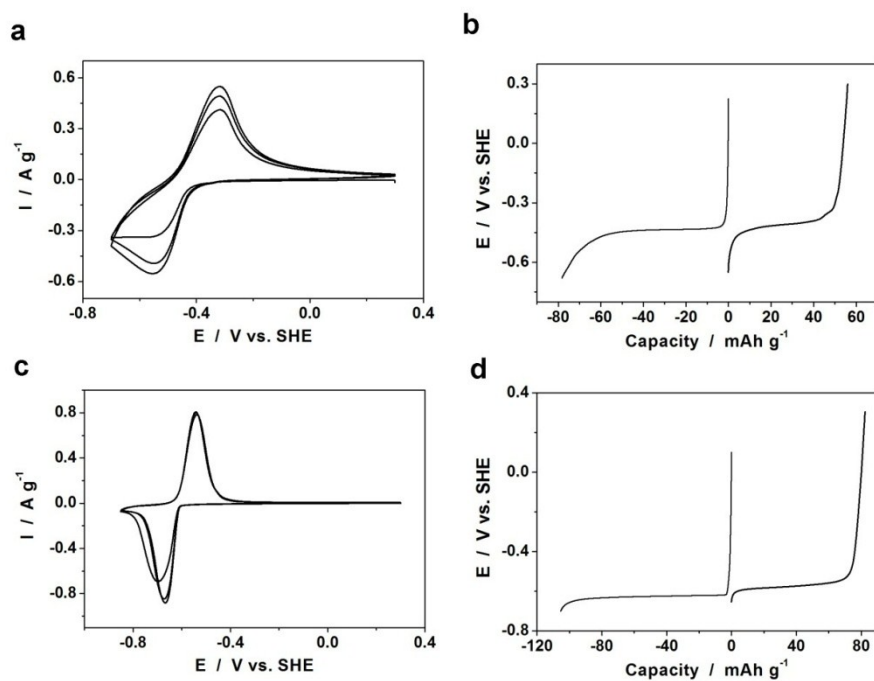

**Figure S5.** (a, c) Cyclic voltammograms at a scan rate of  $0.3 \text{ mV s}^{-1}$  for carbon-coated  $\text{NaTi}_2(\text{PO}_4)_3$  in 0.5 M  $\text{Na}_2\text{SO}_4$  and  $\text{TiP}_2\text{O}_7$  in 0.5 M  $\text{Li}_2\text{SO}_4$  (initial 3 cycles). (b, d) galvanostatic profiles of carbon-coated  $\text{NaTi}_2(\text{PO}_4)_3$  and  $\text{TiP}_2\text{O}_7$ . All electrode potentials are vs. standard hydrogen electrode (SHE).

**Figure S6**

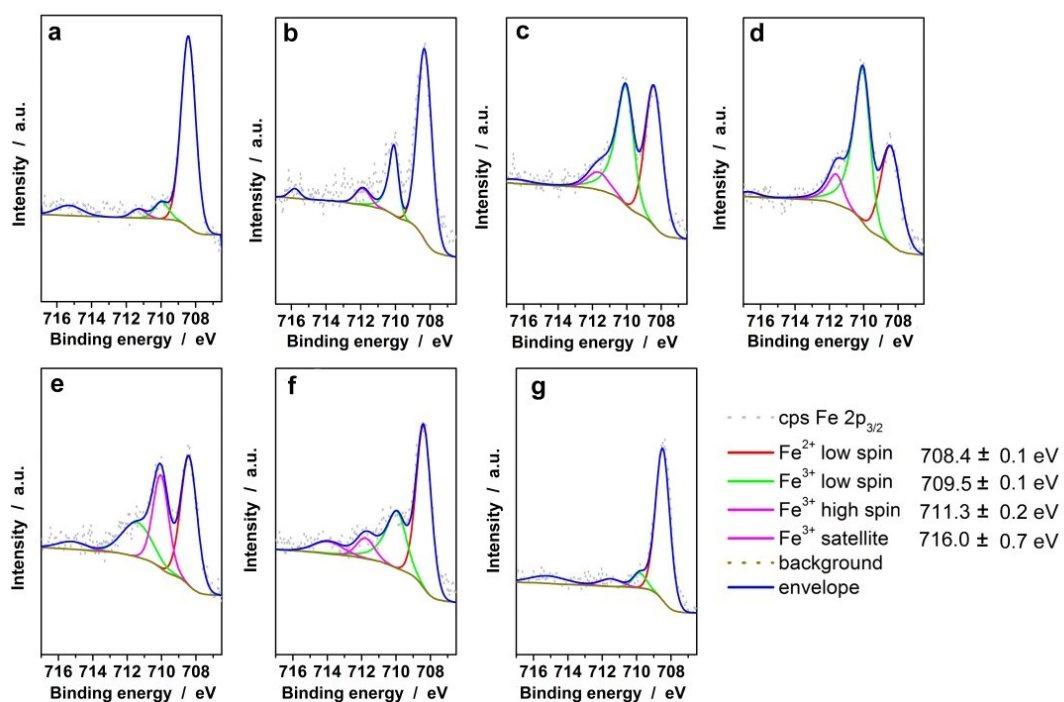

**Figure S6 a-g.** *ex-situ* XPS peak fitting spectra from Fe 2p<sub>3/2</sub> core level of CuHCF at different charging/discharging states.

**Figure S7**

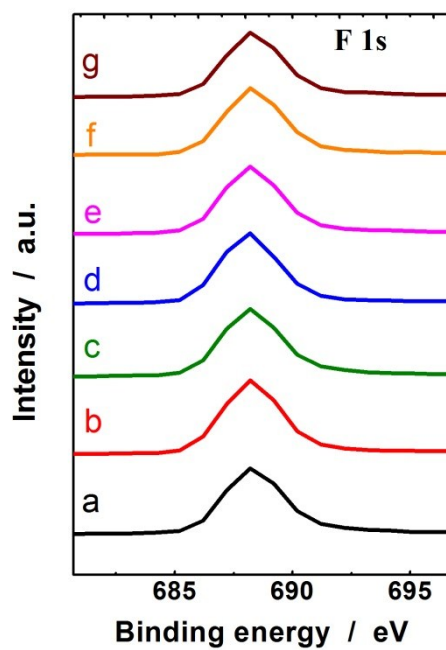

**Figure S7.** *Ex-situ* XPS spectra recorded from F 1s core level of CuHCF/Gr at a-g states. The explanations of different states are illustrated in the caption of Figure 5 in the manuscript.

**Table S1.** Structural parameter of CnHCF in the *Fm-3m* structure determined from Rietveld method using powder X-ray diffraction data (Rietveld) and *ab initio* calculations with the GGA+U approximation (GGA+U).

| Structural parameters |                           | Value           |              |
|-----------------------|---------------------------|-----------------|--------------|
|                       |                           | <i>Rietveld</i> | <i>GGA+U</i> |
| Lattice parameter     | $a = b = c$               | 10.09           | 10.22        |
|                       | $\alpha = \beta = \gamma$ | 90°             | 90°          |
| Bond distance         | Fe-C                      | 1.92Å           | 1.92Å        |
|                       | Cu-N                      | 1.92Å           | 2.05Å        |
|                       | C-N                       | 1.21Å           | 1.17Å        |
| Angle                 | $\angle \text{Cu-N-C}$    | 180°            | 180°         |
|                       | $\angle \text{Fe-C-N}$    | 180°            | 180°         |

**Table S2.** The compositions of Fe(II) and Fe(III) in CuHCF/Gr at different states via peak fitting of XPS spectra.

| States | Percentage / % |         |                 |
|--------|----------------|---------|-----------------|
|        | Fe(II)         | Fe(III) | Fe(III)/ Fe(II) |
| a      | 84.25          | 15.75   | 0.19            |
| b      | 66.36          | 33.64   | 0.51            |
| c      | 47.45          | 52.55   | 1.11            |
| d      | 40.63          | 59.37   | 1.46            |
| e      | 44.07          | 55.93   | 1.27            |
| f      | 57.52          | 42.48   | 0.74            |
| g      | 81.64          | 18.36   | 0.22            |

**Table S3.** Atomic concentration of different elements in graphene modified CuHCF during electrochemical cycling.

| States | Atomic concentration / % |       |       |       |
|--------|--------------------------|-------|-------|-------|
|        | K                        | Fe    | N     | Cu    |
| a      | 5.38                     | 14.21 | 46.06 | 8.77  |
| b      | 3.47                     | 18.33 | 41.86 | 10.63 |
| c      | 2.55                     | 17.39 | 44.84 | 10.27 |
| d      | 0.64                     | 17.74 | 42.82 | 12.49 |
| e      | 2.01                     | 20.21 | 42.12 | 10.13 |
| f      | 2.94                     | 18.64 | 44.80 | 10.32 |
| g      | 5.22                     | 12.01 | 46.52 | 11.21 |

**Table S4.** Mole ratio of different elements in graphene modified CuHCF during charging process.

| States         | Mole ratio / %                       |                                     |                                                                            |           |       |       |
|----------------|--------------------------------------|-------------------------------------|----------------------------------------------------------------------------|-----------|-------|-------|
|                | Na/Fe                                | K/Fe                                | (Na+K)/F<br>e                                                              | Na/F<br>e | K/Fe  | Na/K  |
|                | 0.5M Na <sub>2</sub> SO <sub>4</sub> | 0.5M K <sub>2</sub> SO <sub>4</sub> | 0.1M Na <sub>2</sub> SO <sub>4</sub> + 0.4M K <sub>2</sub> SO <sub>4</sub> |           |       |       |
| Q <sub>1</sub> | 78.21                                | 92.14                               | 83.85                                                                      | 4.06      | 79.79 | 5.09  |
| Q <sub>2</sub> | 49.12                                | 42.12                               | 39.55                                                                      | 3.32      | 36.23 | 9.17  |
| Q <sub>3</sub> | 4.30                                 | 3.46                                | 2.99                                                                       | 0.99      | 1.99  | 49.83 |
